# Supplementary material
Source: HighWire-hosted journal article supplement (http://qhc.bmj.com/highwire/filestream/147254/field_highwire_adjunct_files/0/QSHC_Appendix1_036129.pdf)
Supplement: QSHC_Appendix1_036129.pdf [file QSHC_Appendix1_036129.pdf]

**APPENDIX A:**  
**TEAMSTEPPS™ TEAMWORK ATTITUDES QUESTIONNAIRE**

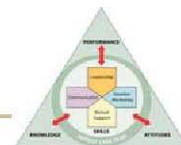

## Teamwork Attitudes Questionnaire

The purpose of this survey is to measure your impressions of various components of teamwork as it relates to patient care and safety.

**Instructions:** Please respond to the questions below by placing a check mark (✓) in the box that corresponds to your level of agreement from *Strongly Disagree* to *Strongly Agree*. Please select only one response for each question.

|                                                                                                                     | Strongly Disagree | Disagree | Neutral | Agree | Strongly Agree |
|---------------------------------------------------------------------------------------------------------------------|-------------------|----------|---------|-------|----------------|
| <b>Team Structure</b>                                                                                               |                   |          |         |       |                |
| 1. It is important to ask patients and their families for feedback regarding patient care.                          |                   |          |         |       |                |
| 2. Patients are a critical component of the care team.                                                              |                   |          |         |       |                |
| 3. This facility's administration influences the success of direct care teams.                                      |                   |          |         |       |                |
| 4. A team's mission is of greater value than the goals of individual team members.                                  |                   |          |         |       |                |
| 5. Effective team members can anticipate the needs of other team members.                                           |                   |          |         |       |                |
| 6. High performing teams in healthcare share common characteristics with high performing teams in other industries. |                   |          |         |       |                |
| <b>Leadership</b>                                                                                                   |                   |          |         |       |                |
| 7. It is important for leaders to share information with team members.                                              |                   |          |         |       |                |
| 8. Leaders should create informal opportunities for team members to share information.                              |                   |          |         |       |                |
| 9. Effective leaders view honest mistakes as meaningful learning opportunities.                                     |                   |          |         |       |                |
| 10. It is a leader's responsibility to model appropriate team behavior.                                             |                   |          |         |       |                |
| 11. It is important for leaders to take time to discuss with their team members plans for each patient.             |                   |          |         |       |                |
| 12. Team leaders should ensure that team members help each other out when necessary.                                |                   |          |         |       |                |

**PLEASE CONTINUE TO THE NEXT PAGE**

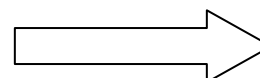



|                                                                                                                                      | Strongly Disagree | Disagree | Neutral | Agree | Strongly Agree |
|--------------------------------------------------------------------------------------------------------------------------------------|-------------------|----------|---------|-------|----------------|
| <b>Situation Monitoring</b>                                                                                                          |                   |          |         |       |                |
| 13. Individuals can be taught how to scan the environment for important situational cues.                                            |                   |          |         |       |                |
| 14. Monitoring patients provides an important contribution to effective team performance.                                            |                   |          |         |       |                |
| 15. Even individuals who are not part of the direct care team should be encouraged to scan for and report changes in patient status. |                   |          |         |       |                |
| 16. It is important to monitor the emotional and physical status of other team members.                                              |                   |          |         |       |                |
| 17. It is appropriate for one team member to offer assistance to another who may be too tired or stressed to perform a task.         |                   |          |         |       |                |
| 18. Team members who monitor their emotional and physical status on the job are more effective.                                      |                   |          |         |       |                |
| <b>Mutual Support</b>                                                                                                                |                   |          |         |       |                |
| 19. To be effective, team members should understand the work of their fellow team members.                                           |                   |          |         |       |                |
| 20. Asking for assistance from a team member is a sign that an individual does not know how to do his/her job effectively.           |                   |          |         |       |                |
| 21. Providing assistance to team members is a sign that an individual does not have enough work to do.                               |                   |          |         |       |                |
| 22. Offering to help a fellow team member with his/her individual work tasks is an effective tool for improving team performance.    |                   |          |         |       |                |
| 23. It is appropriate to continue to assert a patient safety concern until you are certain that it has been heard.                   |                   |          |         |       |                |
| 24. Personal conflicts between team members do not affect patient safety.                                                            |                   |          |         |       |                |

PLEASE CONTINUE TO THE NEXT PAGE

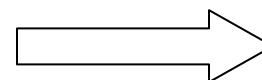

|               |                                                                                                        | <div>Strongly Disagree</div> <div>Disagree</div> <div>Neutral</div> <div>Agree</div> <div>Strongly Agree</div> |  |  |  |  |
|---------------|--------------------------------------------------------------------------------------------------------|----------------------------------------------------------------------------------------------------------------|--|--|--|--|
| Communication |                                                                                                        |                                                                                                                |  |  |  |  |
| 25.           | Teams that do not communicate effectively significantly increase their risk of committing errors.      |                                                                                                                |  |  |  |  |
| 26.           | Poor communication is the most common cause of reported errors.                                        |                                                                                                                |  |  |  |  |
| 27.           | Adverse events may be reduced by maintaining an information exchange with patients and their families. |                                                                                                                |  |  |  |  |
| 28.           | I prefer to work with team members who ask questions about information I provide.                      |                                                                                                                |  |  |  |  |
| 29.           | It is important to have a standardized method for sharing information when handing off patients.       |                                                                                                                |  |  |  |  |
| 30.           | It is nearly impossible to train individuals how to be better communicators.                           |                                                                                                                |  |  |  |  |

Please provide any additional comments in the space below.

**Thank you for your participation!**
